# Supplementary material for: An effective H2S sensor based on SnO2 nanowires decorated with NiO nanoparticles by electron beam evaporation
Source: Royal Society of Chemistry journal article supplement (doi:10.1039/c9ra01105f), 2019-01-01

## Electronic Supporting Information

**Figure S1.** SEM image of the bare SnO<sub>2</sub> nanowires

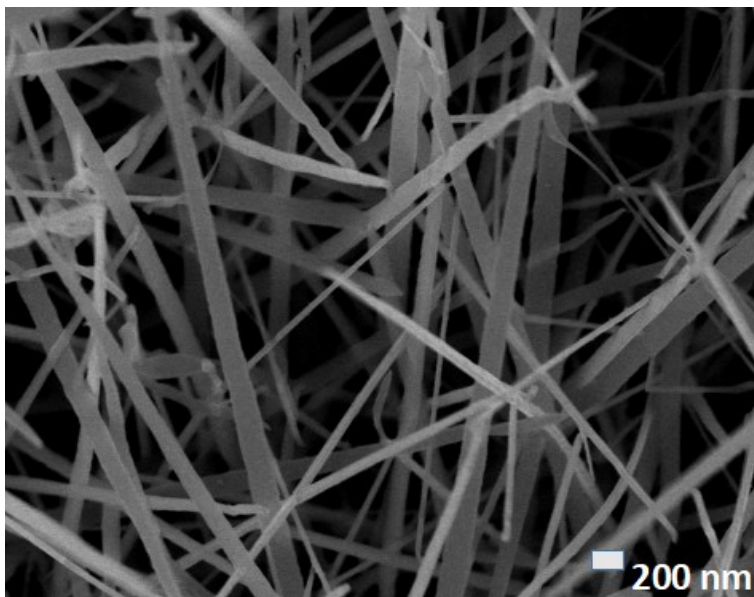

**Figure S2.** EDS analysis of NiO-SnO<sub>2</sub> nanowires

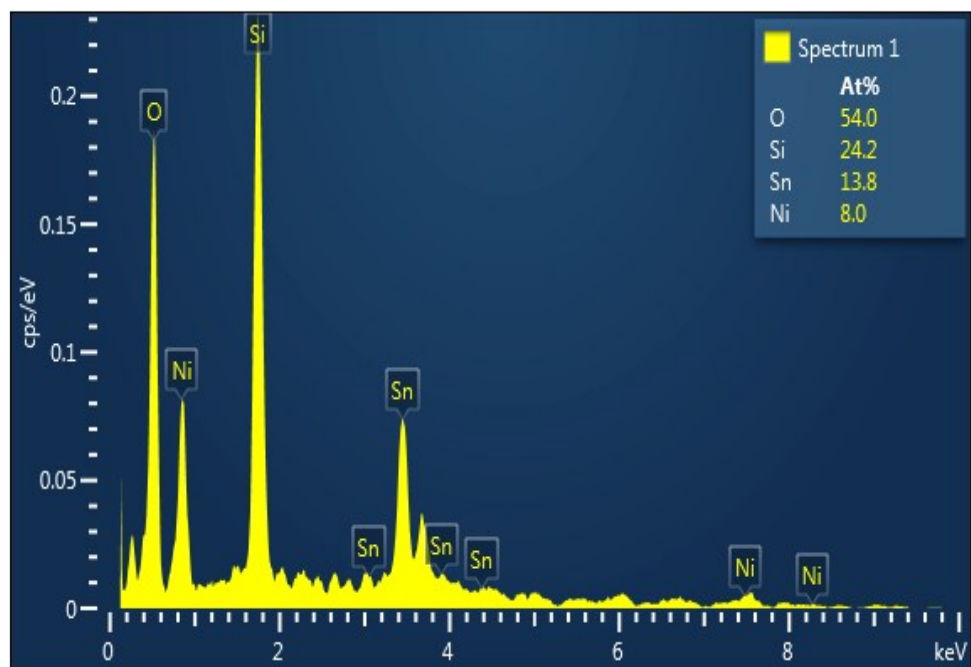

Figure S3. H<sub>2</sub>S response of the bare SnO<sub>2</sub> nanowire sensor measured at different temperatures

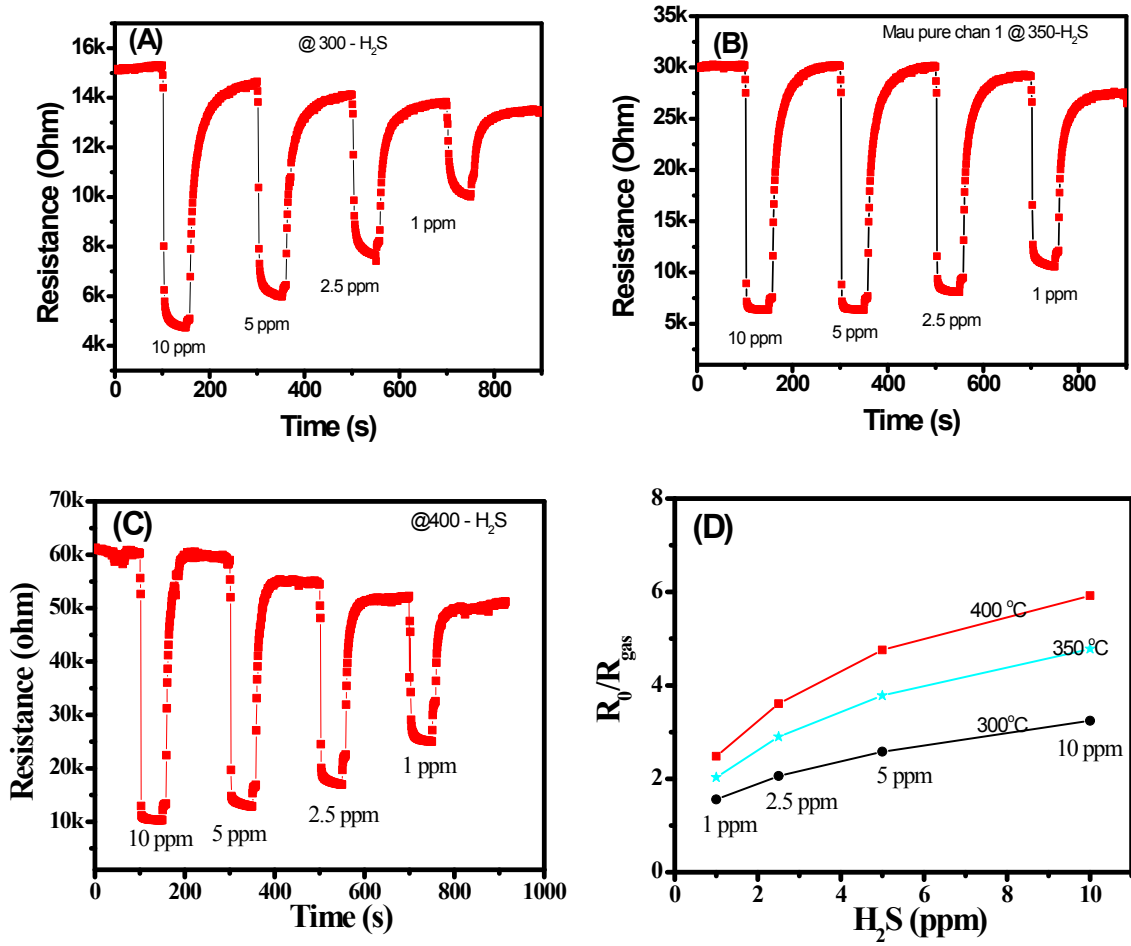

Supplement: c9ra01105f1.pdf [file c9ra01105f1.pdf]
